# Supplementary material
Source: PubMed Central journal article supplement (PMC2866091)
Supplement: NIHMS196405-supplement-ESI.pdf [file NIHMS196405-supplement-ESI.pdf]

## ***meso*-Octamethylcalix[4]pyrrole: an old yet new transmembrane ion-pair transporter†‡**

Christine C. Tong,<sup>a</sup> Roberto Quesada<sup>\*b</sup> Jonathan L. Sessler<sup>c</sup> and Philip A. Gale<sup>\*a</sup>

Electronic supplementary information

### *Synthesis of meso-octabutylcalix[4]pyrrole*

A few drops of methane sulfonic acid were added to a solution of 5-nonanone (12.5 mL, 0.072 mol) and pyrrole (5 mL, 0.072 mol) in ethanol (75 mL) and heated to reflux for 3 hours. The resulting brown-black solution was reduced to approximately half its original volume using a rotary evaporator and then refrigerated overnight. This procedure yields a white crystalline solid in 6% yield, which was isolated by vacuum filtration. Impurities presumed to be *N*-confused by-products were removed by washing with methanol. The residue was dried under vacuum at 30–40 °C overnight to give a light beige solid. When necessary, this material was purified by flash chromatography over silica gel by eluting with CH<sub>2</sub>Cl<sub>2</sub>; under these conditions, the product moves with the solvent front.

<sup>1</sup>H NMR (300 MHz, CD<sub>2</sub>Cl<sub>2</sub>) δ 6.95 (s, 4H), 5.91 (d, 8H), 2.1-0.9 (br, 72H)

<sup>13</sup>C NMR (75 MHz, CD<sub>2</sub>Cl<sub>2</sub>) δ 137.0, 104.6, 42.4, 36.3, 26.2, 23.5, 14.2.

IR (cm<sup>-1</sup>) 3444, 2954, 2929, 2859, 1466, 1415, 1378, 1183, 1035, 756, 724, 664, 509, 497.

ESI MS (-ve mode) [m/z, (%)] M+Cl<sup>-</sup> 800.0

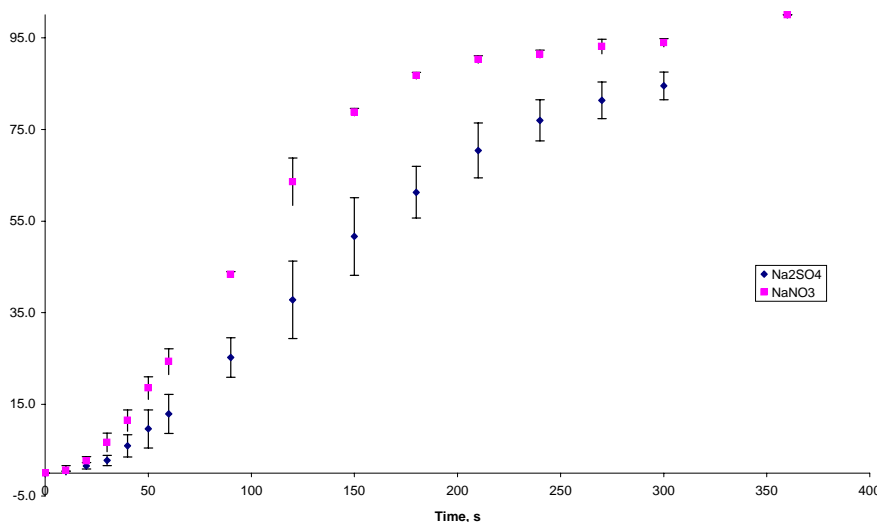

Figure S1 Chloride efflux promoted upon addition of **1** (2 % molar carrier to lipid) to unilamellar POPC vesicles loaded with 488 mM CsCl (■), 5mM phosphate buffer pH 7.2 dispersed in 488 mM NaNO<sub>3</sub> 5mM phosphate buffer pH 7.2 and unilamellar POPC vesicles loaded with 488 mM CsCl (●) 5mM phosphate buffer pH 7.2 dispersed in 145 mM Na<sub>2</sub>SO<sub>4</sub> including error bars c.f. Figure 3 in communication.
